# Supplementary material for: Barriers to colorectal cancer screening in the Eastern Mediterranean Region: a scoping review using the theoretical domains framework
Source: PubMed Central journal article supplement — J Gastrointest Oncol. 2023 Jun 27;14(3):1576–92. doi: 10.21037/jgo-22-510 (PMC10331737; doi:10.21037/jgo-22-510), 2023-06-27
Supplement: jgo-14-03-1576-supplementary.pdf [file jgo-14-03-1576-supplementary.pdf]

## Appendix 1 Search strategy terms: PubMed

("Intestinal Neoplasms"[Mesh] or ((colorectal[tw] or colon[tw] or rectum[tw] or rectal[tw] or intestines[tw] or intestinal[tw] or bowel[tw]) and (cancer[tw] or cancers[tw] or "Neoplasms"[Mesh]))) AND (Afghanistan[tw] or Bahrain[tw] or Djibouti[tw] or Egypt[tw] or iran[tw] or Iraq[tw] or Jordan[tw] or Kuwait[tw] or Lebanon[tw] or Libya[tw] or morocco[tw] or Palestine[tw] or Palestinian[tw] or oman[tw] or Pakistan[tw] or Qatar[tw] or Saudi arabia[tw] or arabian[tw] or Somalia[tw] or sudan[tw] or Tunisia[tw] or united arab emirates[tw] or yemen[tw] or emro[tw] or eastern Mediterranean[tw]) AND ("prevention and control" [Subheading] or screening[tw] or guideline[tw] or guidelines[tw] or campaign[tw] or outreach[tw] or education[tw] or early detection[tw] OR "Early Detection of Cancer"[Mesh])

## Appendix 2 Search strategy terms: Scopus

(INDEXTERMS ("Intestinal Neoplasms") OR ((TITLE-ABS-KEY ("colorectal") OR TITLE-ABS-KEY ("colon") OR TITLE-ABS-KEY ("rectum") OR TITLE-ABS-KEY ("rectal") OR TITLE-ABS-KEY ("intestines") OR TITLE-ABS-KEY ("intestinal") OR TITLE-ABS-KEY ("bowel"))) AND (TITLE-ABS-KEY ("cancer") OR TITLE-ABS-KEY ("cancers") OR INDEXTERMS ("Neoplasms")))) AND (TITLE-ABS-KEY ("Afghanistan") OR TITLE-ABS-KEY ("Bahrain") OR TITLE-ABS-KEY ("Djibouti") OR TITLE-ABS-KEY ("Egypt") OR TITLE-ABS-KEY ("iran") OR TITLE-ABS-KEY ("Iraq") OR TITLE-ABS-KEY ("Jordan") OR TITLE-ABS-KEY ("Kuwait") OR TITLE-ABS-KEY ("Lebanon") OR TITLE-ABS-KEY ("Libya") OR TITLE-ABS-KEY ("morocco") OR TITLE-ABS-KEY ("Palestine") OR TITLE-ABS-KEY ("Palestinian") OR TITLE-ABS-KEY ("oman") OR TITLE-ABS-KEY ("Pakistan") OR TITLE-ABS-KEY ("Qatar") OR TITLE-ABS-KEY ("Saudi arabia") OR TITLE-ABS-KEY ("arabian") OR TITLE-ABS-KEY ("Somalia") OR TITLE-ABS-KEY ("sudan") OR TITLE-ABS-KEY ("Tunisia") OR TITLE-ABS-KEY ("united arab emirates") OR TITLE-ABS-KEY ("yemen") OR TITLE-ABS-KEY ("emro") OR TITLE-ABS-KEY ("eastern Mediterranean")) AND (("prevention and control [Subheading]") OR TITLE-ABS-KEY ("screening") OR TITLE-ABS-KEY ("guideline") OR TITLE-ABS-KEY ("guidelines") OR TITLE-ABS-KEY ("campaign") OR TITLE-ABS-KEY ("outreach") OR TITLE-ABS-KEY ("education") OR TITLE-ABS-KEY ("early detection") OR INDEXTERMS ("Early Detection of Cancer")) AND (LIMIT-TO (PUBYEAR, 2021) OR LIMIT-TO (PUBYEAR, 2020) OR LIMIT-TO (PUBYEAR, 2019) OR LIMIT-TO (PUBYEAR, 2018) OR LIMIT-TO (PUBYEAR, 2017) OR LIMIT-TO (PUBYEAR, 2016) OR LIMIT-TO (PUBYEAR, 2015) OR LIMIT-TO (PUBYEAR, 2014) OR LIMIT-TO (PUBYEAR, 2013) OR LIMIT-TO (PUBYEAR, 2012) OR LIMIT-TO (PUBYEAR, 2011) OR LIMIT-TO (PUBYEAR, 2010) OR LIMIT-TO (PUBYEAR, 2009) OR LIMIT-TO (PUBYEAR, 2008) OR LIMIT-TO (PUBYEAR, 2007) OR LIMIT-TO (PUBYEAR, 2006) OR LIMIT-TO (PUBYEAR, 2005) OR LIMIT-TO (PUBYEAR, 2004) OR LIMIT-TO (PUBYEAR, 2003) OR LIMIT-TO (PUBYEAR, 2002) OR LIMIT-TO (PUBYEAR, 2001))
